# Supplementary material for: Comparing Web-Based Provider-Initiated and Patient-Initiated Survivorship Care Planning for Cancer Patients: A Randomized Controlled Trial
Source: PubMed Central journal article supplement (PMC5369624; doi:10.2196/cancer.5947), 2016-08-30
Supplement: cancer_v2i2e12_app2.pdf [file cancer_v2i2e12_app2.pdf]

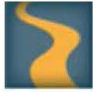

# My Care Plan

This Survivorship Care Plan will help you manage your health care after treatment for cancer. Fill in the *General Information* and *Self-Assessment* to the best of your abilities. Then, work with your oncology provider to fill in the *Treatment Summary* and *Follow-up Care* sections. Be sure to visit the Journey Forward Survivorship Library ([JourneyForward.org/Library](http://JourneyForward.org/Library)) to view and print factsheets related to your cancer, symptoms and ongoing needs, and keep these with your Care Plan. When your Plan is complete, make an appointment to review it with your primary care provider. Keep your Plan handy when talking with healthcare providers over time.

Reviewed with my oncologist  Reviewed with my primary care provider

## General Information

Last updated   
Your name   
Your date of birth

### YOUR CARE TEAM

### NAME & CONTACT INFORMATION

|                             |                      |
|-----------------------------|----------------------|
| Support contact             | <input type="text"/> |
| Primary care provider       | <input type="text"/> |
| Hematologist/oncologist     | <input type="text"/> |
| Surgeon                     | <input type="text"/> |
| Radiation oncologist        | <input type="text"/> |
| OB-GYN ♀                    | <input type="text"/> |
| Nurse/nurse practitioner    | <input type="text"/> |
| Mental health/social worker | <input type="text"/> |
| <input type="text"/>        | <input type="text"/> |
| <input type="text"/>        | <input type="text"/> |
| <input type="text"/>        | <input type="text"/> |
| <input type="text"/>        | <input type="text"/> |
| <input type="text"/>        | <input type="text"/> |
| <input type="text"/>        | <input type="text"/> |

## Self-Assessment

Check any symptoms you are experiencing. **Discuss symptom management and treatments with a healthcare professional.**

|                                                                                                                                                                                                                                                                                                                                                                                                                                                                                                                                                                                                                                                                                                                                                                                                                                                                                                                                                                                                                                                                                                                                                                                                                                                                                                                                                                                                         |                                                                                                                                                                                                                                                                                                                                                                                                                                                                                                                                                                                                                                                                                                                                                                                                                                                                                                                                                                                                                                                                                                                                                                                                                                                                                                                                                                                               |
|---------------------------------------------------------------------------------------------------------------------------------------------------------------------------------------------------------------------------------------------------------------------------------------------------------------------------------------------------------------------------------------------------------------------------------------------------------------------------------------------------------------------------------------------------------------------------------------------------------------------------------------------------------------------------------------------------------------------------------------------------------------------------------------------------------------------------------------------------------------------------------------------------------------------------------------------------------------------------------------------------------------------------------------------------------------------------------------------------------------------------------------------------------------------------------------------------------------------------------------------------------------------------------------------------------------------------------------------------------------------------------------------------------|-----------------------------------------------------------------------------------------------------------------------------------------------------------------------------------------------------------------------------------------------------------------------------------------------------------------------------------------------------------------------------------------------------------------------------------------------------------------------------------------------------------------------------------------------------------------------------------------------------------------------------------------------------------------------------------------------------------------------------------------------------------------------------------------------------------------------------------------------------------------------------------------------------------------------------------------------------------------------------------------------------------------------------------------------------------------------------------------------------------------------------------------------------------------------------------------------------------------------------------------------------------------------------------------------------------------------------------------------------------------------------------------------|
| <input type="checkbox"/> Abdominal pain<br><input type="checkbox"/> Changes in appetite<br><input type="checkbox"/> Chest pain<br><input type="checkbox"/> Chronic constipation<br><input type="checkbox"/> Chronic diarrhea<br><input type="checkbox"/> Cough or wheezing<br><input type="checkbox"/> Decreased exercise ability<br><input type="checkbox"/> Dental problems<br><input type="checkbox"/> Difficulty breathing<br><input type="checkbox"/> Dizziness<br><input type="checkbox"/> Dry mouth<br><input type="checkbox"/> Easy bruising or bleeding<br><input type="checkbox"/> Fatigue<br><input type="checkbox"/> Fertility concerns<br><input type="checkbox"/> Fever and sweats<br><input type="checkbox"/> General weakness<br><input type="checkbox"/> Hair loss<br><input type="checkbox"/> Hearing loss<br><input type="checkbox"/> Heartburn/indigestion<br><input type="checkbox"/> Hot flashes/night sweats<br><input type="checkbox"/> Irregular heartbeat/palpitations<br><input type="checkbox"/> Jaundice (yellowing of skin or eyes)<br><input type="checkbox"/> Joint pain or muscle aches<br><input type="checkbox"/> Leg pain with exertion<br><input type="checkbox"/> Memory/concentration issues<br><input type="checkbox"/> Negative body image<br><input type="checkbox"/> New/changed moles or freckles<br><input type="checkbox"/> Numbness/weakness on one side | <input type="checkbox"/> Pain or problems with eating<br><input type="checkbox"/> Pain with urination<br><input type="checkbox"/> Painful eyes<br><input type="checkbox"/> Pins and needles or numbness<br><input type="checkbox"/> Recurrent colds/coughs/infections<br><input type="checkbox"/> Relationship problems<br><input type="checkbox"/> Sexual dysfunction/lack of desire<br><input type="checkbox"/> Shortness of breath<br><input type="checkbox"/> Skin changes, rashes, lumps or bumps<br><input type="checkbox"/> Sleep-wake disturbances<br><input type="checkbox"/> Slurred speech<br><input type="checkbox"/> Swelling of arm or leg<br><input type="checkbox"/> Swollen lymph nodes<br><input type="checkbox"/> Urinary incontinence<br><input type="checkbox"/> Vision problems<br><input type="checkbox"/> Weight gain or overweight<br><input type="checkbox"/> Weight loss or loss of appetite<br><br><div style="text-align: center;">♀ WOMEN ONLY</div> <input type="checkbox"/> Abnormal vaginal bleeding<br><input type="checkbox"/> Irregular menses (periods)<br><input type="checkbox"/> Vaginal discharge<br><input type="checkbox"/> Vaginal dryness<br><input type="checkbox"/> Painful intercourse<br><input type="checkbox"/> Premature menopause<br><br><div style="text-align: center;">♂ MEN ONLY</div> <input type="checkbox"/> Erectile dysfunction |
|---------------------------------------------------------------------------------------------------------------------------------------------------------------------------------------------------------------------------------------------------------------------------------------------------------------------------------------------------------------------------------------------------------------------------------------------------------------------------------------------------------------------------------------------------------------------------------------------------------------------------------------------------------------------------------------------------------------------------------------------------------------------------------------------------------------------------------------------------------------------------------------------------------------------------------------------------------------------------------------------------------------------------------------------------------------------------------------------------------------------------------------------------------------------------------------------------------------------------------------------------------------------------------------------------------------------------------------------------------------------------------------------------------|-----------------------------------------------------------------------------------------------------------------------------------------------------------------------------------------------------------------------------------------------------------------------------------------------------------------------------------------------------------------------------------------------------------------------------------------------------------------------------------------------------------------------------------------------------------------------------------------------------------------------------------------------------------------------------------------------------------------------------------------------------------------------------------------------------------------------------------------------------------------------------------------------------------------------------------------------------------------------------------------------------------------------------------------------------------------------------------------------------------------------------------------------------------------------------------------------------------------------------------------------------------------------------------------------------------------------------------------------------------------------------------------------|

| SYMPTOM            | NOT PRESENT           | . . . . . WORST IMAGINABLE |                       |                       |                       |                       |                       |                       |                       |                       |                       |
|--------------------|-----------------------|----------------------------|-----------------------|-----------------------|-----------------------|-----------------------|-----------------------|-----------------------|-----------------------|-----------------------|-----------------------|
|                    | <b>0</b>              | <b>1</b>                   | <b>2</b>              | <b>3</b>              | <b>4</b>              | <b>5</b>              | <b>6</b>              | <b>7</b>              | <b>8</b>              | <b>9</b>              | <b>10</b>             |
| Pain               | <input type="radio"/> | <input type="radio"/>      | <input type="radio"/> | <input type="radio"/> | <input type="radio"/> | <input type="radio"/> | <input type="radio"/> | <input type="radio"/> | <input type="radio"/> | <input type="radio"/> | <input type="radio"/> |
| Anxiety/worry      | <input type="radio"/> | <input type="radio"/>      | <input type="radio"/> | <input type="radio"/> | <input type="radio"/> | <input type="radio"/> | <input type="radio"/> | <input type="radio"/> | <input type="radio"/> | <input type="radio"/> | <input type="radio"/> |
| Fear of recurrence | <input type="radio"/> | <input type="radio"/>      | <input type="radio"/> | <input type="radio"/> | <input type="radio"/> | <input type="radio"/> | <input type="radio"/> | <input type="radio"/> | <input type="radio"/> | <input type="radio"/> | <input type="radio"/> |
| Depression/sadness | <input type="radio"/> | <input type="radio"/>      | <input type="radio"/> | <input type="radio"/> | <input type="radio"/> | <input type="radio"/> | <input type="radio"/> | <input type="radio"/> | <input type="radio"/> | <input type="radio"/> | <input type="radio"/> |

Adapted from the UCLA Survivorship Center Medical History Intake Form.



## Follow-up Care

Visit the [Survivorship Library](http://JourneyForward.org/Library) (JourneyForward.org/Library) to see guidelines for follow-up care. **BE SURE TO CONSULT WITH YOUR ONCOLOGY PROVIDER TO DETERMINE THE RIGHT SCHEDULE OF FOLLOW-UP TESTS AND VISITS FOR YOU.**

| FOLLOW-UP TESTS & VISITS           | WHEN/HOW OFTEN? | PROVIDER TO CONTACT |
|------------------------------------|-----------------|---------------------|
| Medical oncology visit             |                 |                     |
| Physical exam                      |                 |                     |
| Bone density scan (DEXA)           |                 |                     |
| Imaging (X-ray, CT, MRI, PET scan) |                 |                     |
| Mammogram                          |                 |                     |
| Pap smear & pelvic exam ♀          |                 |                     |
| PSA & rectal exam ♂                |                 |                     |
| Colonoscopy                        |                 |                     |
|                                    |                 |                     |
|                                    |                 |                     |
|                                    |                 |                     |
|                                    |                 |                     |
|                                    |                 |                     |

| WELLNESS                                               | COMMENTS |
|--------------------------------------------------------|----------|
| <input type="checkbox"/> Diet & nutrition              |          |
| <input type="checkbox"/> Exercise                      |          |
| <input type="checkbox"/> Mental health                 |          |
| <input type="checkbox"/> Bone health                   |          |
| <input type="checkbox"/> Immunizations                 |          |
| <input type="checkbox"/> Cholesterol management        |          |
| <input type="checkbox"/> Diabetic screening/management |          |
| <input type="checkbox"/> Hypertension control          |          |
| <input type="checkbox"/> Smoking cessation             |          |
|                                                        |          |
|                                                        |          |
|                                                        |          |

OTHER COMMENTS
